# Supplementary material for: Association of circulating Fibroblast Growth Factor-2 with progression of HIV-chronic kidney diseases in children
Source: bioRxiv or medRxiv preprint supplement (doi:10.1101/2020.12.08.20246280), 2020-12-11

## SUPPLEMENTARY MATERIAL

### **Supplemental Figure 1.** *FGF-2 and Alcian blue staining in renal glomeruli and vessels.*

Panel A shows renal glomeruli from a child with HIV-HUS exposed to the control primary antibody (non-specific IG) as described the Methods section. Panel B shows renal glomeruli from the same child with HIV-HUS stained with the FGF-2 antibody (red). Panels C and D show renal vessels stained with Alcian blue (C) or the FGF-2 antibody (red). Scale bars, A-D, 25  $\mu$ m. (PDF file)

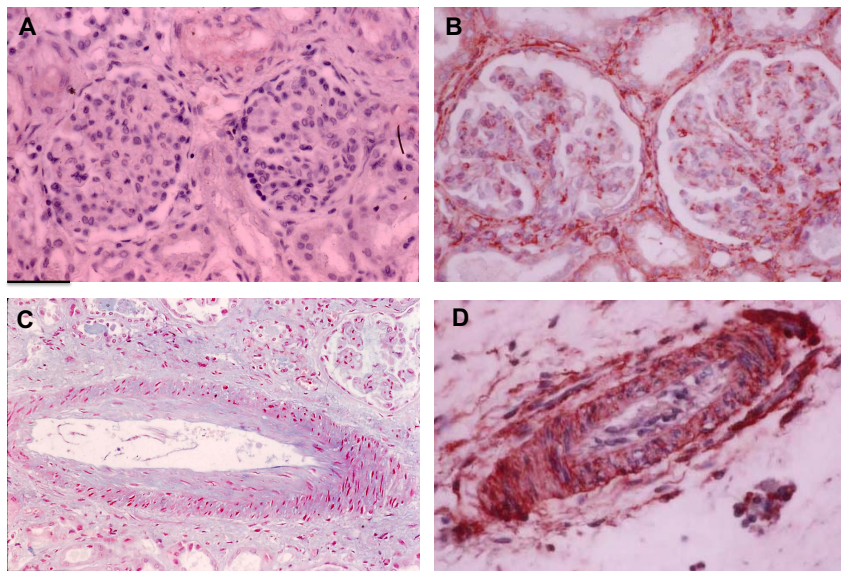

Supplement: Supplementary file [file media-1.pdf]
